# Supplementary material for: Photoresponsive structure transformation and emission enhancement based on a tapered azobenzene gelator
Source: Royal Society of Chemistry journal article supplement (doi:10.1039/c5ra06456b), 2015-01-01
Supplement: c5ra06456b1.pdf [file c5ra06456b1.pdf]

## Supporting Information

### Photoresponsive structure transformation and emission enhancement based on a tapered azobenzene gelator

Lili Shi<sup>a</sup>, Xia Ran<sup>a\*</sup>, Yajie Li<sup>a</sup>, Qiuyue Li<sup>a</sup>, Weihong Qiu<sup>b</sup> and Lijun Guo<sup>a\*</sup>

<sup>a</sup>Department of Physics, School of Physics and Electronics, Henan University, Kaifeng 475004, People's Republic of China

<sup>b</sup>Department of Physics, Oregon State University, Corvallis OR 97331, USA.

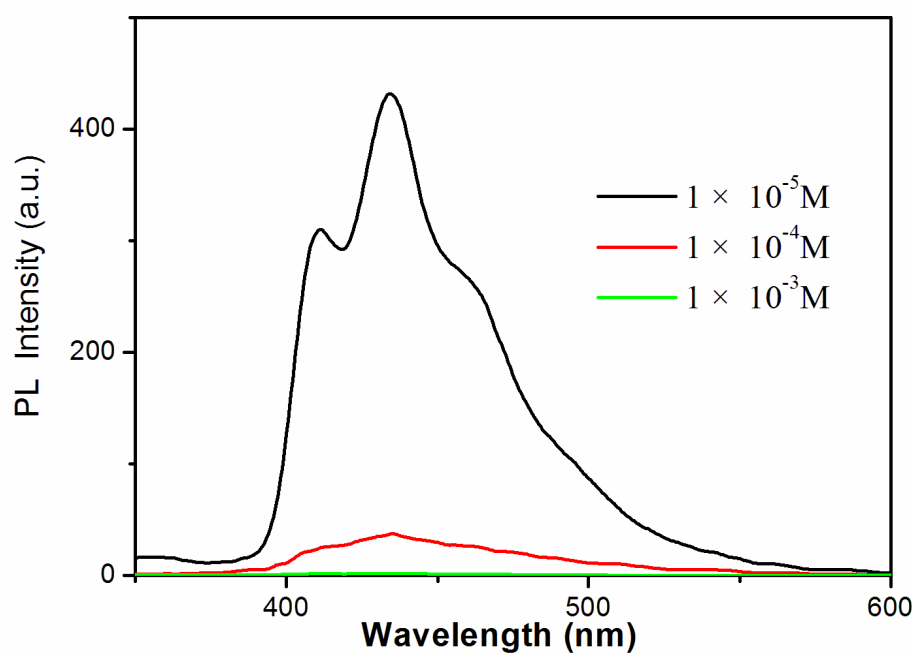

**Figure S1** Fluorescence spectra of AOB-t4 in ethanol at different concentrations.

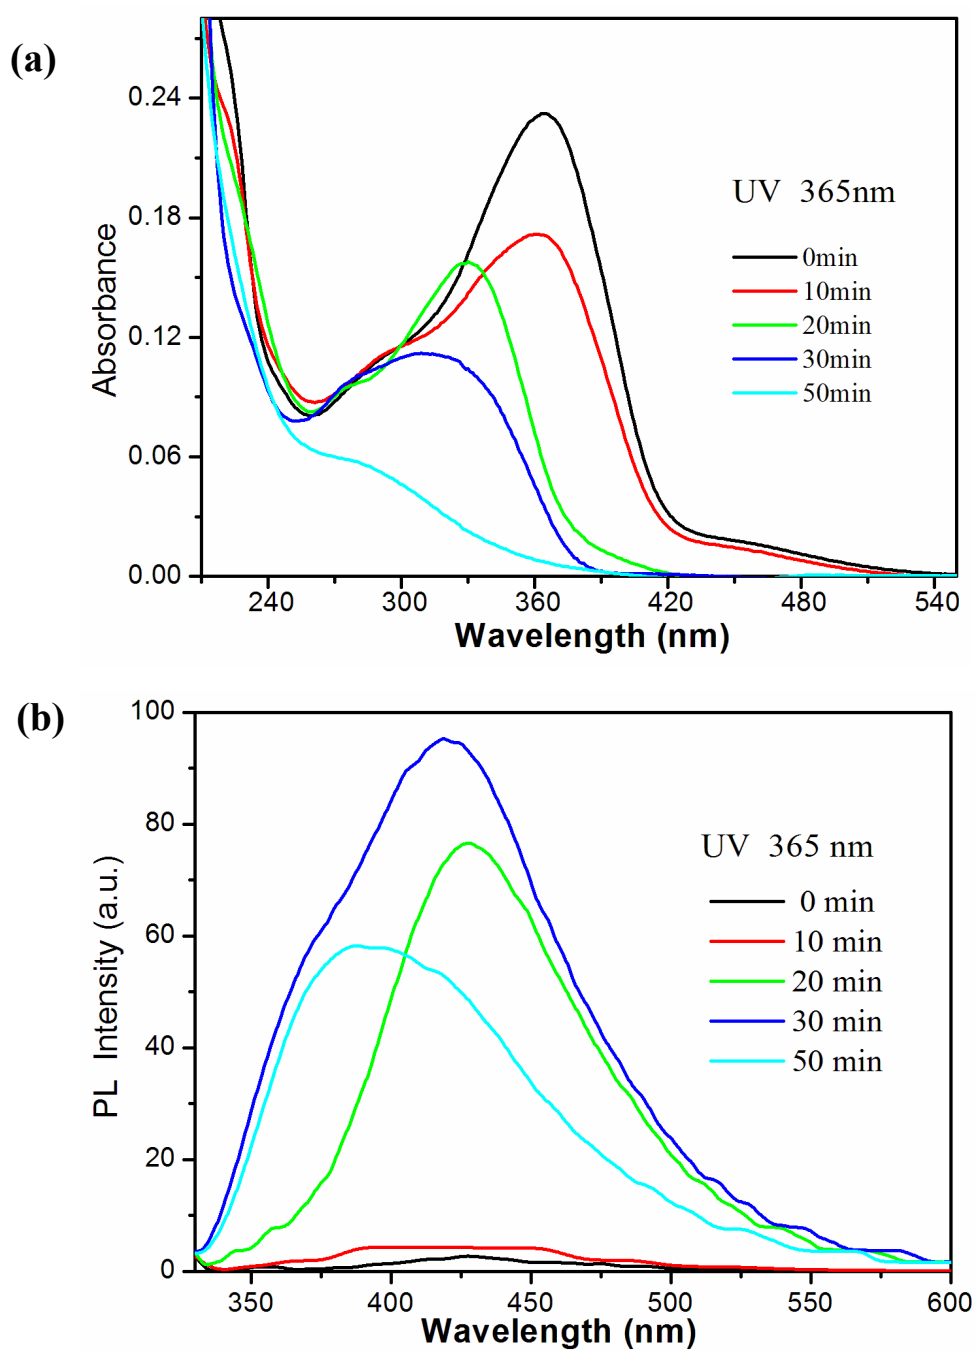

**Figure S2** (a) UV-vis spectra and (b) fluorescence spectra of AOB-t4 in ethanol ( $1 \times 10^{-5}$ ) under irradiation at 365 nm for different time period at room temperature.

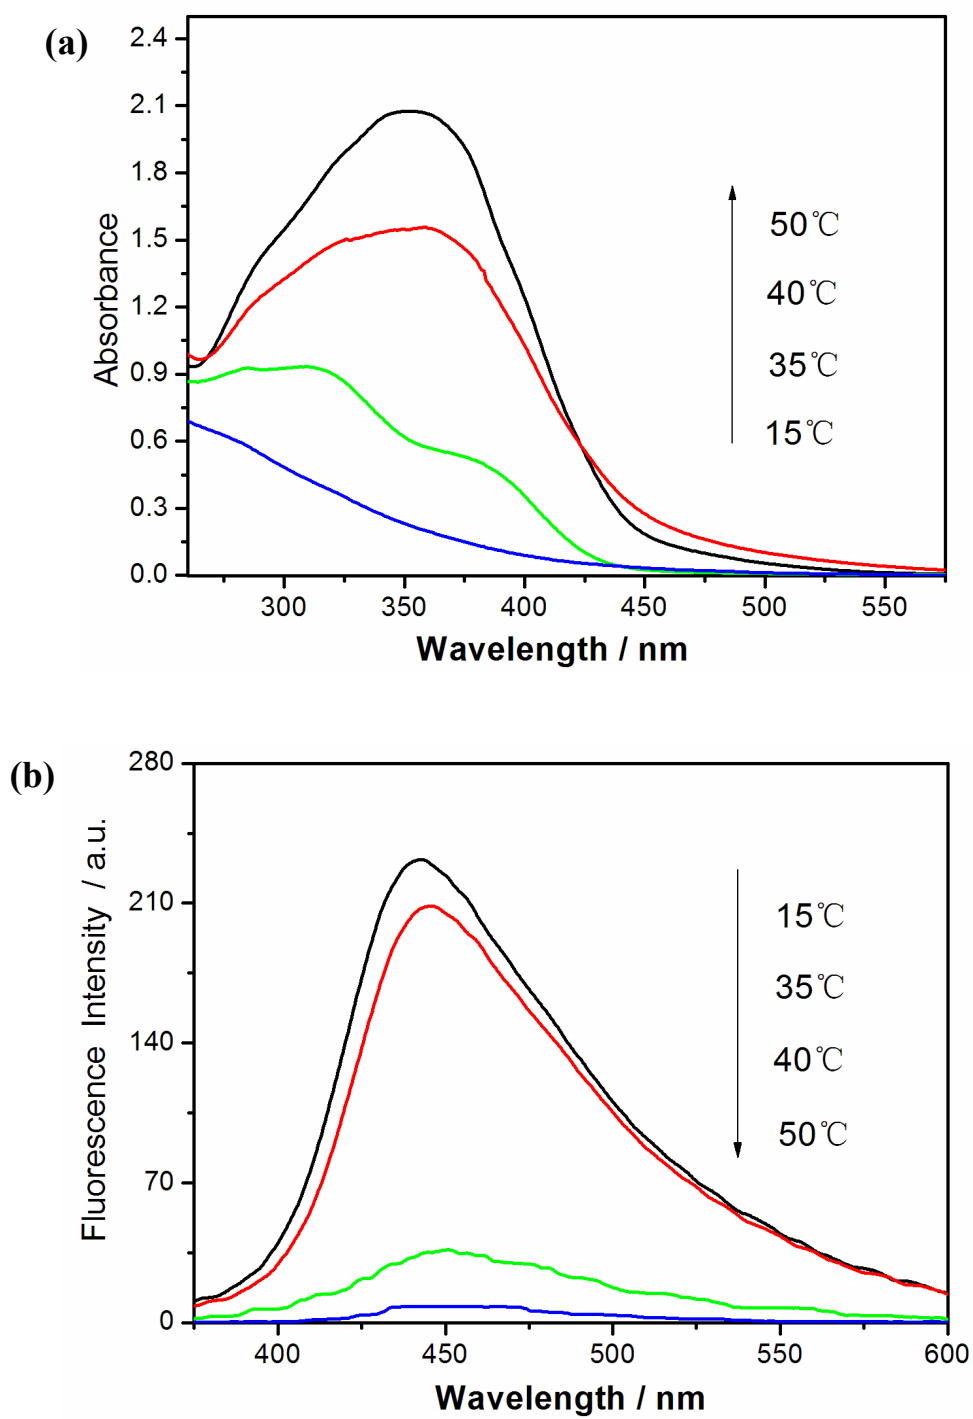

**Figure S3** (a) UV-vis spectra and (b) fluorescence spectra of cis-AOB-t4 sol in dichloromethane (2 mg/mL) at different temperature.

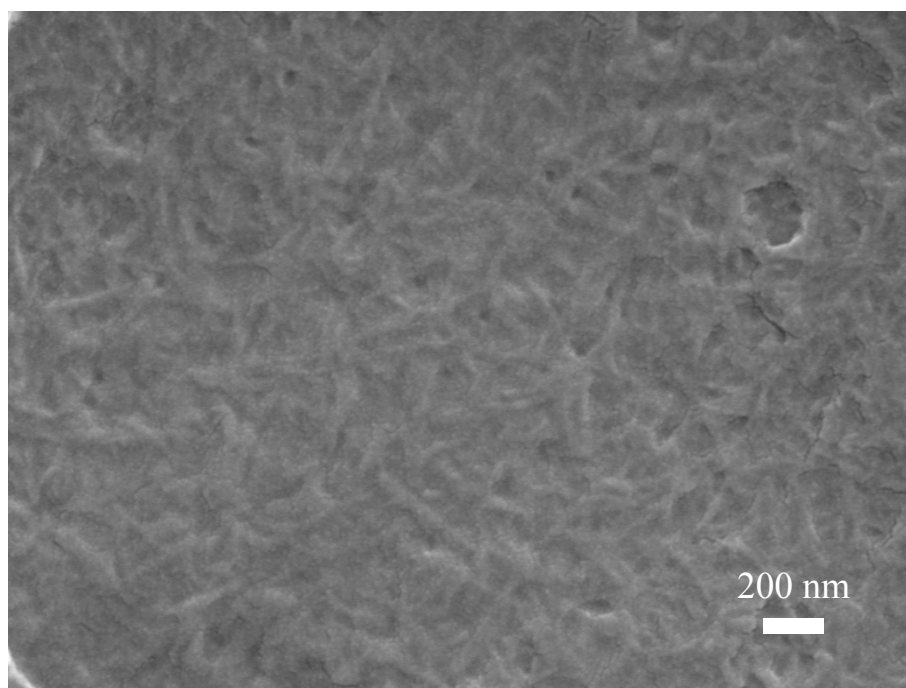

**Figure S4** SEM image of the recovered gel of *trans*-AOB-t4 from dichloromethane.
